# Supplementary material for: Synthesis of PtCoNiRu/C nanoparticles by spray drying combined with reduction sintering for methanol electro-oxidation
Source: Royal Society of Chemistry journal article supplement (doi:10.1039/c9ra09764c), 2020-01-01
Supplement: c9ra09764c1.pdf [file c9ra09764c1.pdf]

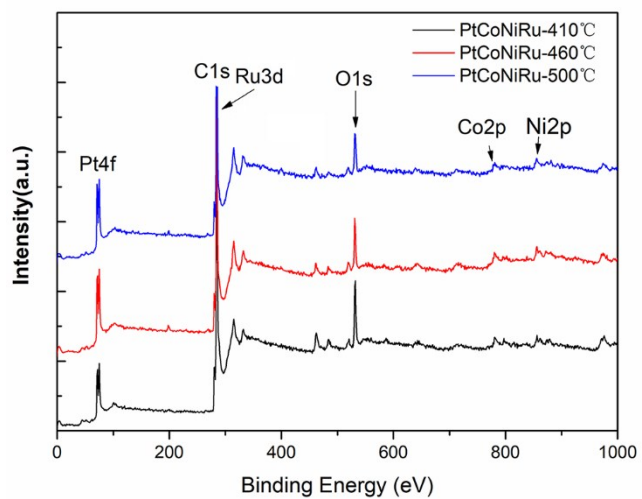

Figure S1. The XPS survey spectra of three PtCoNiRu/C samples sintered at 410 °C, 460 °C and 500 °C

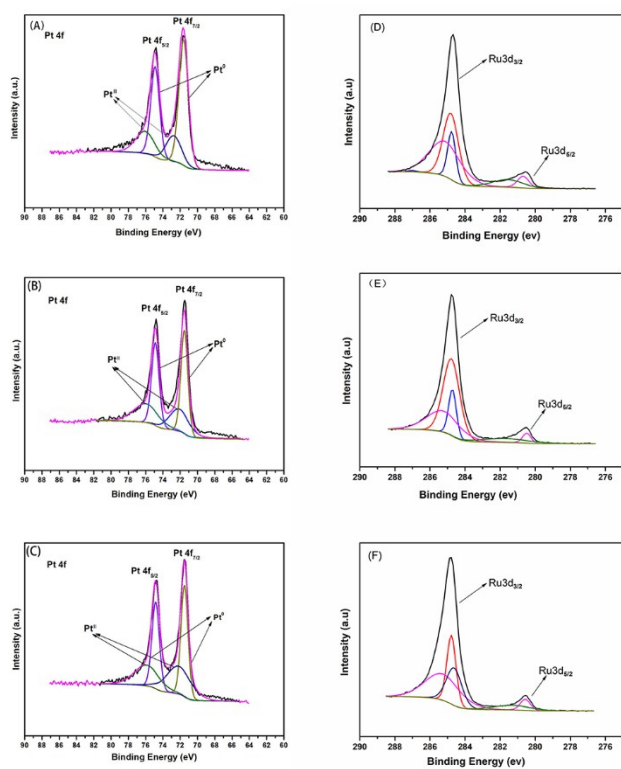

Figure S2. Curve fitting of XPS spectra for Pt4f (A), (B), (C) and Ru3d (D),(E),(F) of three PtCoNiRu/C sintered at 410 °C, 460 °C, 500 °C, respectively

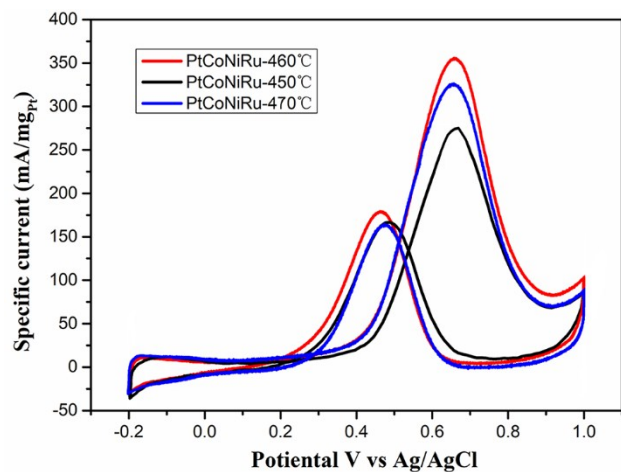

Figure S3. Cyclic voltammograms for methanol electro-oxidation in solution containing 0.5 M H<sub>2</sub>SO<sub>4</sub> + 0.5M CH<sub>3</sub>OH on PtCoNiRu/C sintered at 450 °C, 460 °C, 470 °C, respectively with the scanning rate of 0.05 V s<sup>-1</sup>

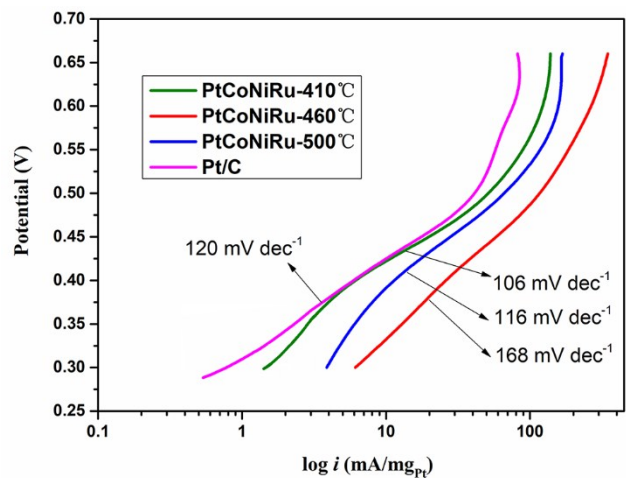

Figure S3. Cyclic voltammograms for methanol electro-oxidation in solution containing 0.5 M H<sub>2</sub>SO<sub>4</sub> + 0.5M CH<sub>3</sub>OH on PtCoNiRu/C sintered at 450 °C, 460 °C, 470 °C, respectively with the scanning rate of 0.05 V s<sup>-1</sup>
